# Supplementary material for: Experimental Cannabinoid 2 Receptor Activation by Phyto-Derived and Synthetic Cannabinoid Ligands in LPS-Induced Interstitial Cystitis in Mice
Source: PubMed Central journal article supplement (PMC6930590; doi:10.3390/molecules24234239), 2019-11-21
Supplement: molecules-24-04239-s001.pdf [file molecules-24-04239-s001.pdf]

## Supplementary Materials:

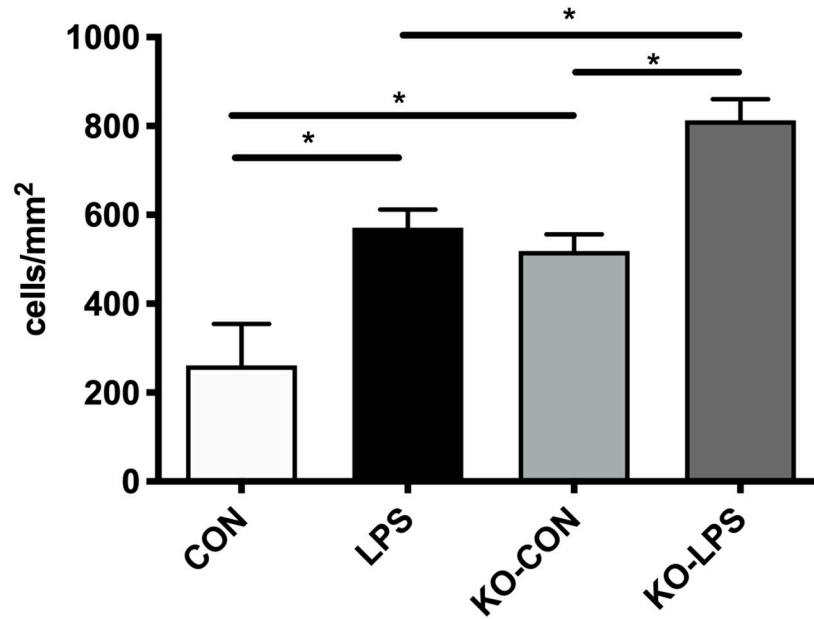

**Figure S1.** Leukocyte adhesion in submucosal bladder venules of female wild-type and CB<sub>2</sub>R knockout (KO) BALB/c mice for the following experimental groups: wildtype control (CON,  $n = 5$ ), LPS-induced IC in wildtype animals (LPS,  $n = 5$ ), CB<sub>2</sub>R KO control (KO-CON,  $n = 5$ ), LPS-induced IC in CB<sub>2</sub>R KO (KO-LPS,  $n = 4$ ). LPS groups received a 50  $\mu$ L intravesical instillation of 150  $\mu$ g/mL LPS, which was replaced by 50  $\mu$ L of saline after 30 min. Control groups received 50  $\mu$ L saline intravesically, replaced by another 50  $\mu$ L saline instillation after 30 min. IVM was performed at the end of the 2 h observation time. Data is presented as mean  $\pm$  SD. \*  $< 0.05$ .
